# Supplementary material for: A flexible membrane electrode with an electrolyte-affinity surface for energy storage: effects of amphiphilic block copolymers and membrane thickness
Source: Royal Society of Chemistry journal article supplement (doi:10.1039/c8se00223a), 2018-01-01
Supplement: c8se00223a1.pdf [file c8se00223a1.pdf]

## Supporting Information

### **Flexible Membrane Electrode with Electrolyte-Affinity Surface for Energy Storage: Effects of Amphiphilic Block Copolymers and Membrane Thickness**

Fen Ran <sup>a, b, \*</sup>, Hezhen Yang <sup>b</sup>, Xiaoning Zhao <sup>b</sup>, Xiaoqin Niu <sup>c, \*</sup>, Yuhong Chen <sup>c</sup>, Lingbin Kong <sup>a, b</sup>

<sup>a</sup> *State Key Laboratory of Advanced Processing and Recycling of Non-ferrous Metals, Lanzhou University of Technology, Lanzhou 730050, P. R. China*

<sup>b</sup> *School of Material Science and Engineering, Lanzhou University of Technology, Lanzhou 730050, P. R. China*

<sup>c</sup> *College of Petrochemical Technology, Lanzhou University of Technology, Lanzhou 730050, P. R. China*

*\*Corresponding Authors: Fen Ran (ranfen@163.com, or ranfen@lut.cn); Xiaoqin Niu (niuxiaoqin@163.com)*

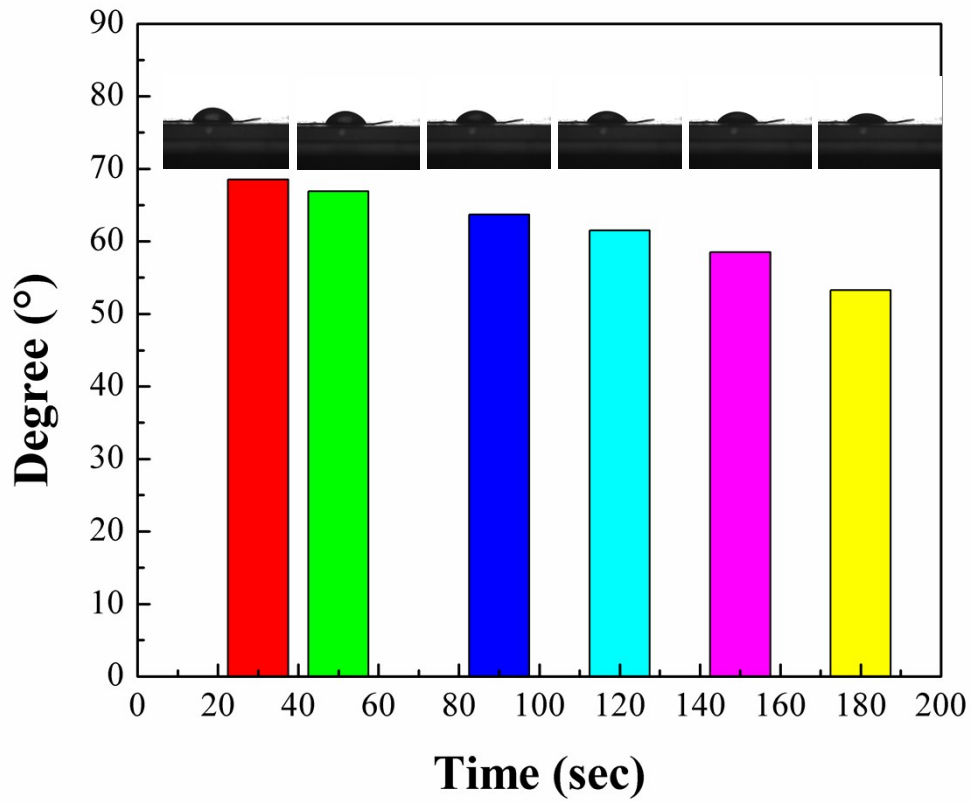

*Figure S1* Dynamic contact angles for FME-PAA-60  $\mu\text{m}$

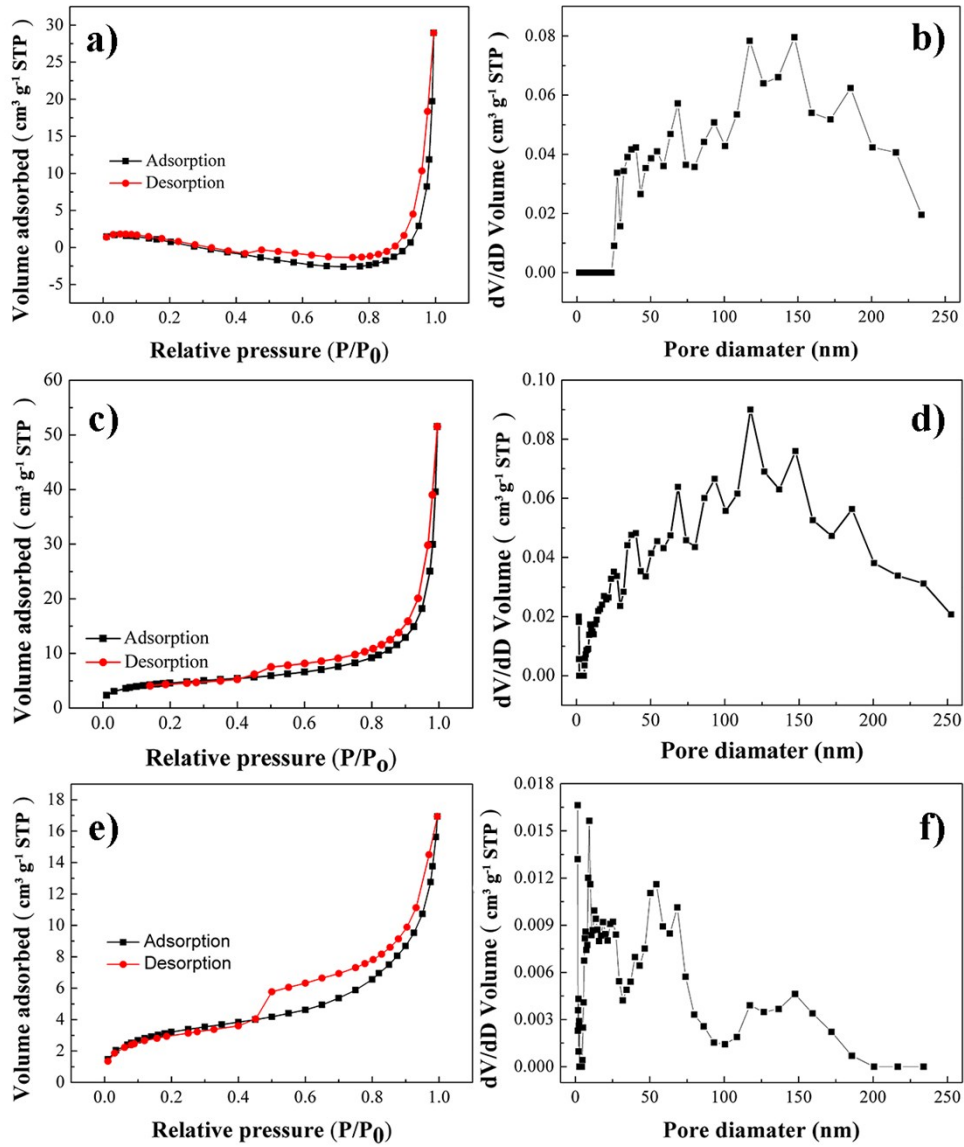

**Figure S2** BET characterization for FME-PAA with different thickness: *a* and *b*) 30  $\mu\text{m}$ , *c* and *d*) 60  $\mu\text{m}$ , and *e* and *f*) 100  $\mu\text{m}$

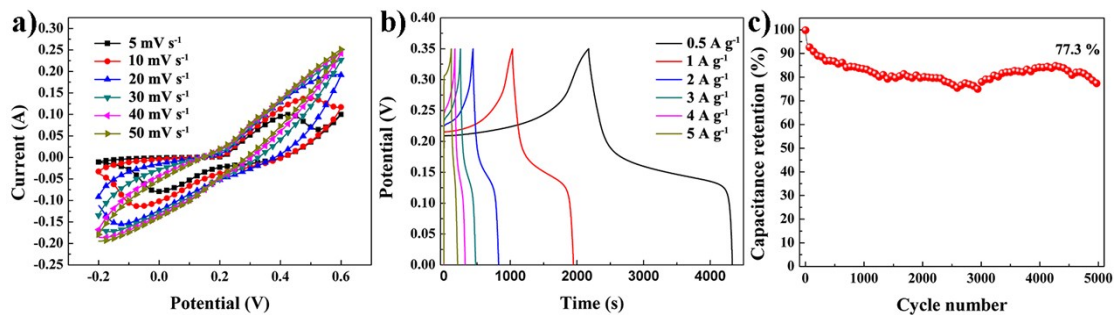

**Figure S3** Electrochemical performance of FME-PAA-60: a) CV, b) GCD, and c) cycle life

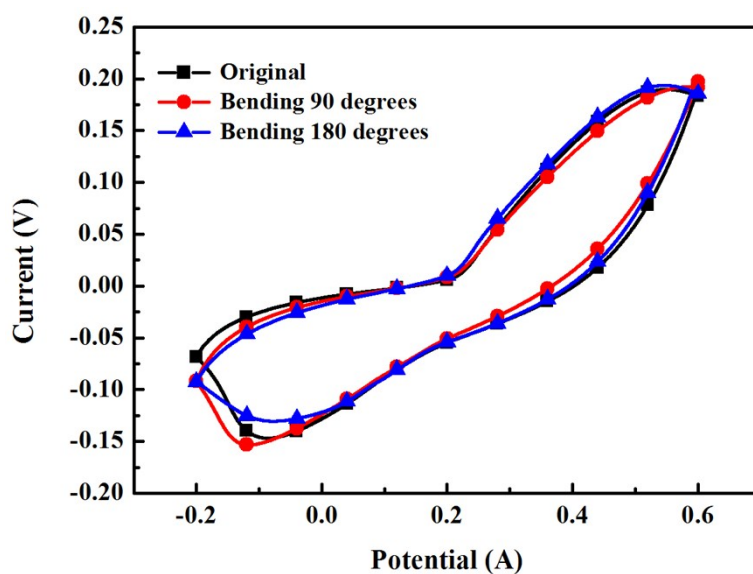

**Figure S4** The CV curves of FME-PAA-60 at different bending states

**Table S1** The energy densities and power densities of various asymmetric supercapacitors based on Ni(OH)<sub>2</sub> reported in literatures

| Asymmetric supercapacitors                               | Specific capacitance    | Energy density & power density                        | Current density or scan rate | Cycle life                | Measurement conditions | Ref.            |
|----------------------------------------------------------|-------------------------|-------------------------------------------------------|------------------------------|---------------------------|------------------------|-----------------|
| Co <sub>3</sub> O <sub>4</sub> @Ni(OH) <sub>2</sub> //AC | 98.40 F g <sup>-1</sup> | 40.0 Wh kg <sup>-1</sup> at 346.9 W kg <sup>-1</sup>  | 0.4 A g <sup>-1</sup>        | 90.5 % after 5000 cycles  | 3 M KOH                | [1]             |
| Ni(OH) <sub>2</sub> /AC/CNT//AC                          | 82.1 F g <sup>-1</sup>  | 32.3 Wh kg <sup>-1</sup> at 504.8 W kg <sup>-1</sup>  | 0.5 A g <sup>-1</sup>        | 83.5 % after 1000 cycles  | 6 M KOH                | [2]             |
| CNT/Ni(OH) <sub>2</sub> // rGO                           | 78 F g <sup>-1</sup>    | 35.0 Wh kg <sup>-1</sup> at 1800 W kg <sup>-1</sup>   | 2 A g <sup>-1</sup>          | –                         | 1 M KOH                | [3]             |
| Ni(OH) <sub>2</sub> – AB //AC                            | 144 F g <sup>-1</sup>   | 18.7 Wh kg <sup>-1</sup> at 1971.0 W kg <sup>-1</sup> | 2 mV s <sup>-1</sup>         | 91.08 % after 5000 cycles | 2 M KOH                | [4]             |
| β -Ni(OH) <sub>2</sub> /Ni-foam//AC                      | 105.8 F g <sup>-1</sup> | 36.2 Wh kg <sup>-1</sup> at 100.6 W kg <sup>-1</sup>  | 0.13 A g <sup>-1</sup>       | 92 % 1000 cycles          | 6 M KOH                | [5]             |
| Ni(OH) <sub>2</sub> @3D Ni//AC                           | 92.8 F g <sup>-1</sup>  | 21.8 Wh kg <sup>-1</sup> at 660 W kg <sup>-1</sup>    | 1 A g <sup>-1</sup>          | 96 % after 3000 cycles    | 1 M KOH                | [6]             |
| FME-PAA-60//FME-AC                                       | 114.1 F g <sup>-1</sup> | 40.6 Wh kg <sup>-1</sup> at 400.0 W kg <sup>-1</sup>  | 0.5 A g <sup>-1</sup>        | 90.7 % after 5000 cycles  | 6 M KOH                | <b>Our work</b> |

## References

1. X Bai, Q Liu, J Liu, et al. Hierarchical  $\text{Co}_3\text{O}_4@\text{Ni}(\text{OH})_2$  core-shell nanosheet arrays for isolated all-solid state supercapacitor electrodes with superior electrochemical performance[J]. *Chemical Engineering Journal*, 2017,315:35-45.
2. L Sui, S Tang, Y Chen, et al. An asymmetric supercapacitor with good electrochemical performances based on  $\text{Ni}(\text{OH})_2/\text{AC}/\text{CNT}$  and  $\text{AC}$ [J]. *Electrochimica Acta*, 2015,182:1159-1165.
3. RR Salunkhe, J Lin, V Malgras, et al. Large-scale synthesis of coaxial carbon nanotube/ $\text{Ni}(\text{OH})_2$  composites for asymmetric supercapacitor application[J]. *Nano Energy*, 2015,11:211-218.
4. RM Kore, BJ Lokhande. Hierarchical mesoporous network of amorphous  $\alpha$ - $\text{Ni}(\text{OH})_2$  for high performance supercapacitor electrode material synthesized from a novel solvent deficient approach[J]. *Electrochimica Acta*, 2017,245(C):780-790.
5. J Huang, P Xu, D Cao, et al. Asymmetric supercapacitors based on  $\beta$ - $\text{Ni}(\text{OH})_2$  nanosheets and activated carbon with high energy density[J]. *Journal of Power Sources*, 2014,246:371-376.
6. YZ Su, K Xiao, N Li, et al. Amorphous  $\text{Ni}(\text{OH})_2@$  three-dimensional Ni core-shell nanostructures for high capacitance pseudocapacitors and asymmetric supercapacitors[J]. *J Mater Chem A*, 2014,2(34):13845-13853.
